# Supplementary material for: Structural stabilization of DNA-templated nanostructures: crosslinking with 2,5-bis(2-thienyl)pyrrole monomers
Source: Royal Society of Chemistry journal article supplement (doi:10.1039/c2ob26716k), 2012-10-12
Supplement: c2ob26716k.pdf [file c2ob26716k.pdf]

## Structural Stabilization of DNA-templated Nanostructures: Crosslinking with 2,5-bis(2-Thienyl)pyrrole Monomers

Wen Chen, Gary Schuster\*

Georgia Institute of Technology, School of Chemistry and Biochemistry,  
Atlanta, GA ,30332 schuster@gatech.edu

Table S-1. ESI Mass analysis of DNA oligomers.

| DNA | calculated | obtained |
|-----|------------|----------|
| 1   | 6392.2     | 6392.0   |
| 2   | 6463.2     | 6463.0   |
| 3   | 6663.6     | 6663.0   |
| 4   | 6734.6     | 6735.0   |
| 5   | 7006.0     | 7006.0   |
| 6   | 8176.8     | 8177.0   |
| 7   | 8234.8     | 8235.0   |
| 8   | 9675.0     | 9675.0   |
| 9   | 9751.1     | 9750.0   |

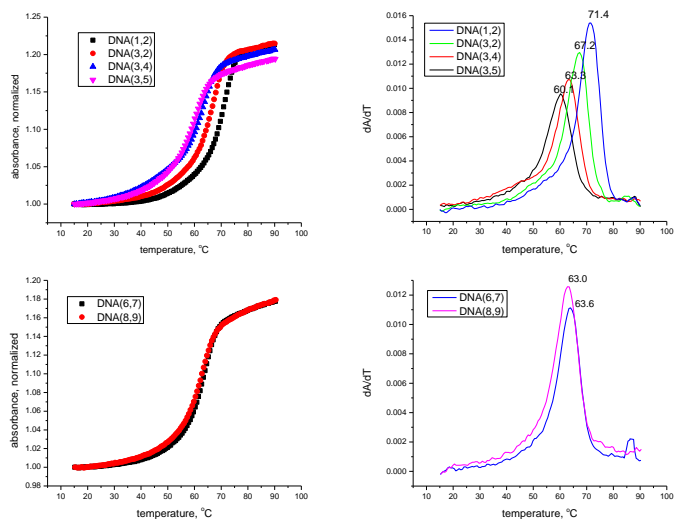

Figure S-1. Melting profiles of SNS-DNA duplexes.

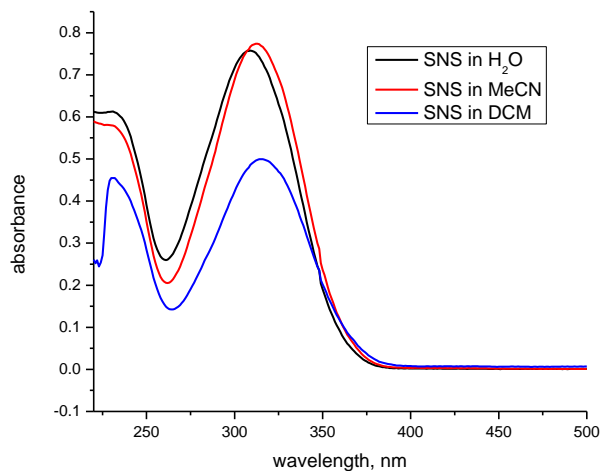

**Figure S-2.** UV-Vis absorption spectra of SNS in different solvents: water (H<sub>2</sub>O), acetonitrile (MeCN), and dichloromethane (DCM).

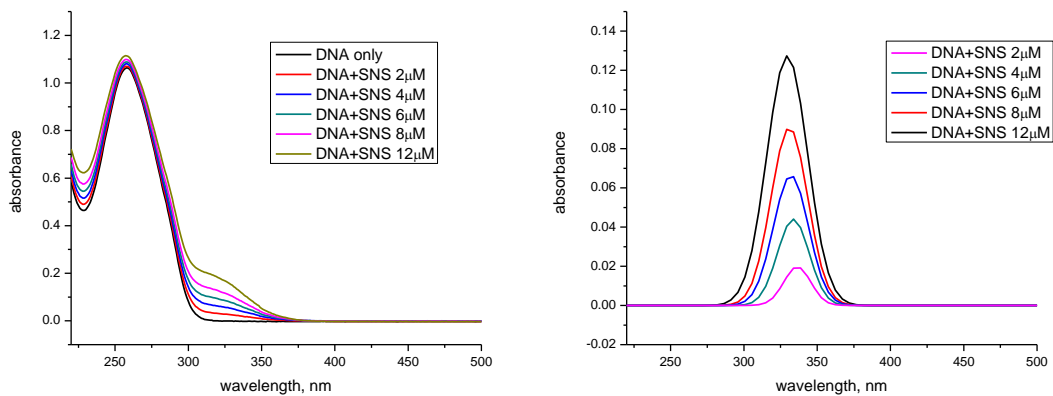

**Figure S-3.** UV-Vis absorption spectra of the mixture of DNA and SNS (0-12 μM) in 10 mM citrate buffer containing 200 mM NaCl at pH 4.5.

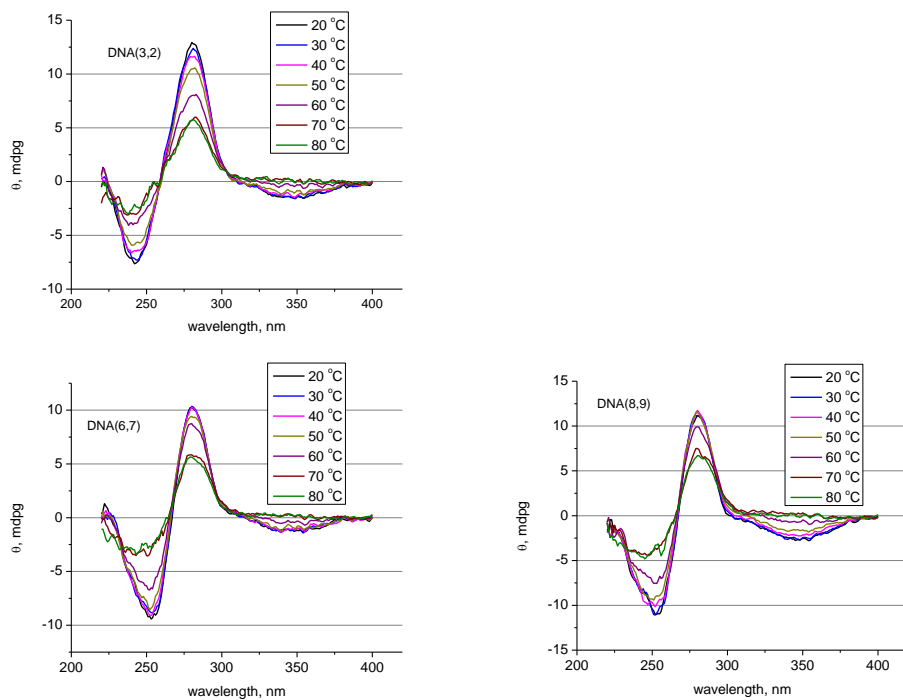

**Figure S-4.** CD spectra of SNS-DNA duplexes at varied temperature from 20 °C to 80 °C.

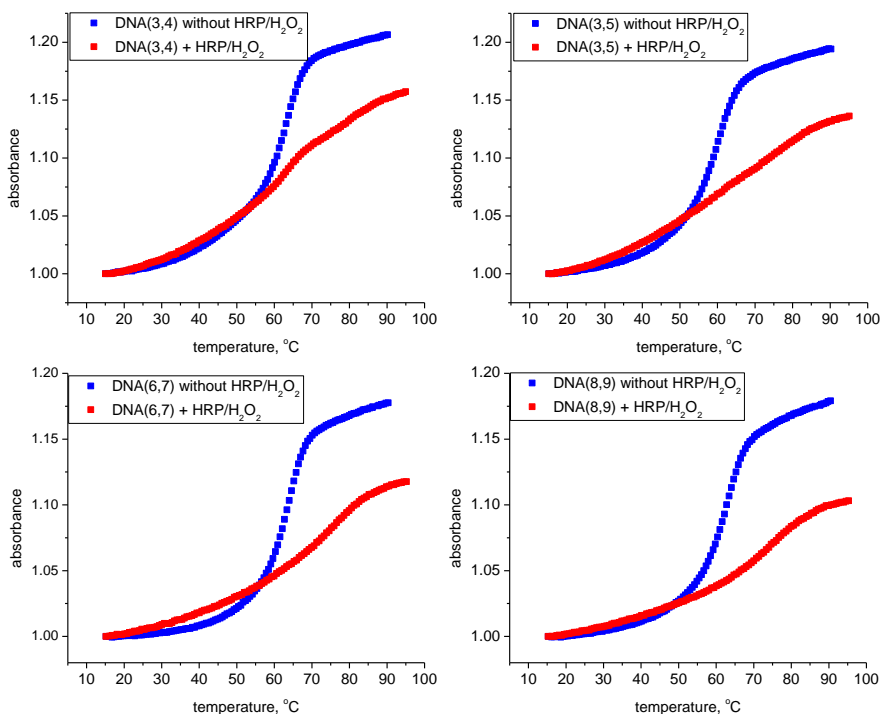

**Figure S-5.** The melting profiles of SNS-DNA duplexes before and after the reaction with HRP/H<sub>2</sub>O<sub>2</sub>.

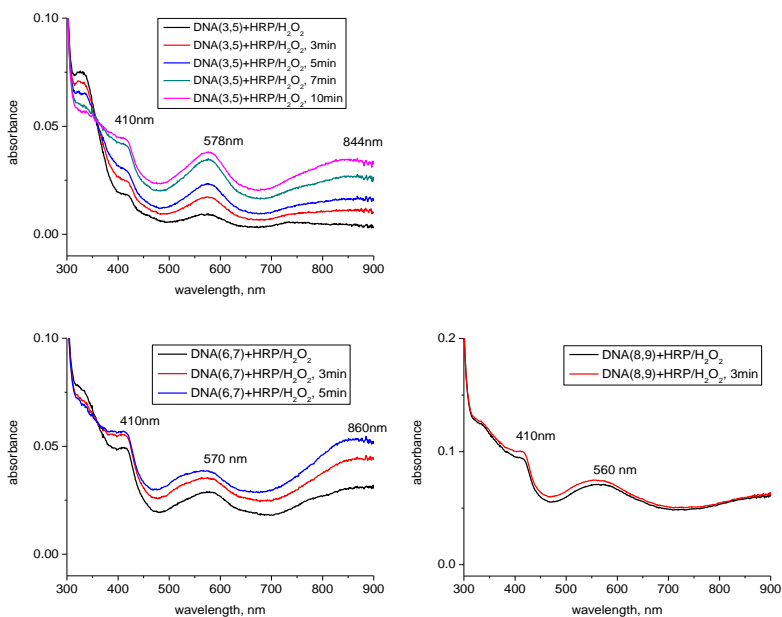

**Figure S-6.** UV-Vis spectra of SNS-DNA after the addition of HRP/H<sub>2</sub>O<sub>2</sub>.

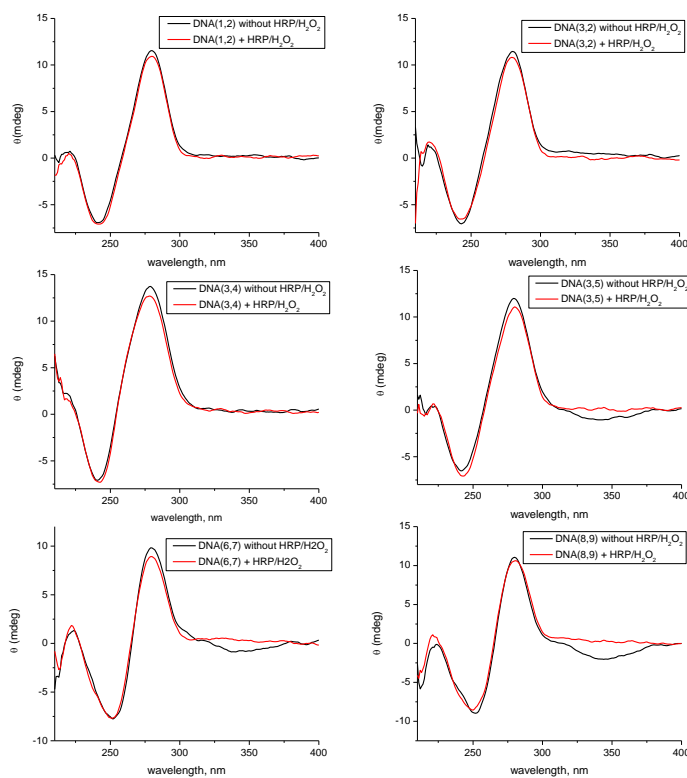

**Figure S-7.** CD spectra of SNS-DNA duplexes before and after the reaction with HRP/H<sub>2</sub>O<sub>2</sub>.

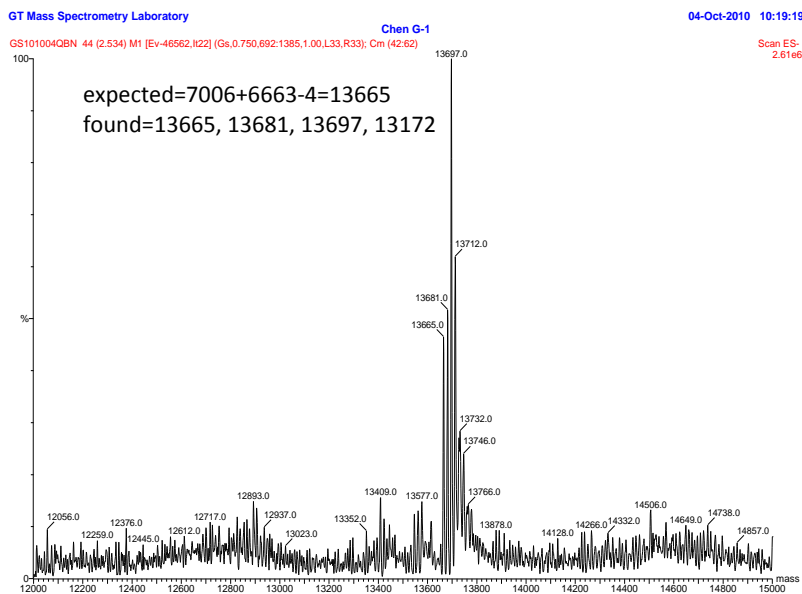

**Figure S-8.** Mass spectrometric analysis of crosslinked DNA(3,5).
